# Supplementary material for: A descriptive study of ten-year longitudinal changes in weight and waist circumference in the multi-ethnic rural Northern Norway. The SAMINOR Study, 2003-2014
Source: PubMed Central journal article supplement (PMC7029861; doi:10.1371/journal.pone.0229234), 2020-02-19
Supplement: pone.0229234.s002.pdf [file pone.0229234.s002.pdf]

S2 Table. Mean (standard deviation, SD) body weight (kg) in SAMINOR 1 (2003-2004) and longitudinal changes in body weight (kg) (95 % confidence interval) from SAMINOR 1 to SAMINOR 2 (2012-2014) according to ethnic group in men born between 1934 and 1967 (aged 36 – 69 in SAMINOR 1) who attended both surveys. The SAMINOR Study (n=1538).

|                 | Birth year               | Age in 2003 (years) | Number of participants | Mean body weight, kg (SD) in SAMINOR 1 | Change in weight, kg (95 % CI) between SAMINOR 1 and SAMINOR 2 |
|-----------------|--------------------------|---------------------|------------------------|----------------------------------------|----------------------------------------------------------------|
| <b>Sami</b>     |                          |                     |                        |                                        |                                                                |
|                 | 1964-1967                | 36-39               | 50                     | 82.9 (13.0)                            | 3.1 (1.4, 4.9)                                                 |
|                 | 1959-1963                | 40-44               | 91                     | 81.3 (11.7)                            | 2.1 (0.9, 3.2)                                                 |
|                 | 1954-1958                | 45-49               | 100                    | 80.2 (12.3)                            | 1.4 (1.0, 2.4)                                                 |
|                 | 1949-1953                | 50-54               | 130                    | 81.0 (13.1)                            | 0.6 (- 0.3, 1.5)                                               |
|                 | 1944-1948                | 55-59               | 127                    | 80.1 (13.1)                            | - 0.6 (- 1.7, 0.6)                                             |
|                 | 1939-1943                | 60-64               | 74                     | 80.1 (13.0)                            | - 0.9 (- 2.0, 0.2)                                             |
|                 | 1934-1938                | 65-69               | 59                     | 78.3 (10.0)                            | - 3.0 (- 4.2, - 1.7)                                           |
|                 |                          |                     |                        |                                        |                                                                |
|                 | All Sami                 | 36-69               | 631                    | 80.5 (12.5)                            | 0.4 (- 0.1, 0.8)                                               |
|                 | p-value for linear trend |                     |                        | 0.07                                   | < 0.001                                                        |
| <b>Non-Sami</b> |                          |                     |                        |                                        |                                                                |
|                 | 1964-1967                | 36-39               | 74                     | 86.1 (12.8)                            | 3.2 (1.8, 4.6)                                                 |
|                 | 1959-1963                | 40-44               | 92                     | 85.5 (12.8)                            | 3.2 (1.9, 4.6)                                                 |
|                 | 1954-1958                | 45-49               | 136                    | 85.3 (11.7)                            | 1.9 (1.0, 2.9)                                                 |
|                 | 1949-1953                | 50-54               | 191                    | 85.0 (12.9)                            | 1.4 ( 0.6, 2.2)                                                |
|                 | 1944-1948                | 55-59               | 181                    | 84.7 (12.0)                            | 0.9 (0, 1.7)                                                   |
|                 | 1939-1943                | 60-64               | 148                    | 82.8 (12.3)                            | - 0.8 (- 1.8, 0.1)                                             |
|                 | 1934-1938                | 65-69               | 85                     | 81.0 (12.5)                            | - 1.8 (- 3.0, - 0.6)                                           |
|                 |                          |                     |                        |                                        |                                                                |
|                 | All non-Sami             | 36-69               | 907                    | 84.4 (12.4)                            | 1.0 (0.7, 1.4)                                                 |
|                 | p-value for linear trend |                     |                        | 0.002                                  | < 0.001                                                        |
