# Supplementary material for: A descriptive study of ten-year longitudinal changes in weight and waist circumference in the multi-ethnic rural Northern Norway. The SAMINOR Study, 2003-2014
Source: PubMed Central journal article supplement (PMC7029861; doi:10.1371/journal.pone.0229234), 2020-02-19
Supplement: pone.0229234.s004.pdf [file pone.0229234.s004.pdf]

S4 Table. Mean (standard deviation, SD) waist circumference (cm) in SAMINOR 1 (2003-2004) and longitudinal changes in waist circumference (cm) (95 % confidence interval) from SAMINOR 1 to SAMINOR 2 (2012-2014) according to ethnic group in men born between 1934 and 1967 (aged 36 – 69 in SAMINOR 1) who attended both surveys. The SAMINOR Study (n=1538).

|                 | Birth year               | Age in 2003 (years) | Number of participants | Mean waist circumference, cm (SD) in SAMINOR 1 | Change in waist circumference, cm (95 % CI), SAMINOR 1 to SAMINOR 2 |
|-----------------|--------------------------|---------------------|------------------------|------------------------------------------------|---------------------------------------------------------------------|
| <b>Sami</b>     |                          |                     |                        |                                                |                                                                     |
|                 | 1964-1967                | 36-39               | 50                     | 90.4 (9.8)                                     | 7.5 (5.7, 9.4)                                                      |
|                 | 1959-1963                | 40-44               | 91                     | 90.3 (8.3)                                     | 7.1 (5.8, 8.5)                                                      |
|                 | 1954-1958                | 45-49               | 100                    | 90.9 (10.1)                                    | 6.2 (4.9, 7.5)                                                      |
|                 | 1949-1953                | 50-54               | 130                    | 91.3 (10.1)                                    | 6.5 (5.4, 7.6)                                                      |
|                 | 1944-1948                | 55-59               | 127                    | 93.8 (11.1)                                    | 5.1 (3.8, 6.5)                                                      |
|                 | 1939-1943                | 60-64               | 74                     | 94.0 (10.9)                                    | 6.0 (4.7, 7.3)                                                      |
|                 | 1934-1938                | 65-69               | 59                     | 94.1 (8.3)                                     | 3.8 (2.1, 5.5)                                                      |
|                 |                          |                     |                        |                                                |                                                                     |
|                 | All Sami                 | 36-69               | 631                    | 92.1 (10.0)                                    | 6.0 (5.5, 6.6)                                                      |
|                 | p-value for linear trend |                     |                        | < 0.001                                        | 0.001                                                               |
| <b>Non-Sami</b> |                          |                     |                        |                                                |                                                                     |
|                 | 1964-1967                | 36-39               | 74                     | 92.1 (9.3)                                     | 7.3 (5.8, 8.8)                                                      |
|                 | 1959-1963                | 40-44               | 92                     | 92.7 (9.9)                                     | 7.3 (5.8, 8.7)                                                      |
|                 | 1954-1958                | 45-49               | 136                    | 92.4 (8.1)                                     | 7.2 (6.1, 8.2)                                                      |
|                 | 1949-1953                | 50-54               | 191                    | 93.6 (10.1)                                    | 6.7 (5.8, 7.6)                                                      |
|                 | 1944-1948                | 55-59               | 181                    | 94.3 (9.7)                                     | 6.1 (5.3, 6.9)                                                      |
|                 | 1939-1943                | 60-64               | 148                    | 93.6 (8.7)                                     | 5.2 (4.3, 6.2)                                                      |
|                 | 1934-1938                | 65-69               | 85                     | 92.9 (10.3)                                    | 6.4 (5.0, 7.8)                                                      |
|                 |                          |                     |                        |                                                |                                                                     |
|                 | All non-Sami             | 36-69               | 907                    | 93.3 (9.5)                                     | 6.5 (6.1, 6.9)                                                      |
|                 | p-value for linear trend |                     |                        | 0.2                                            | 0.006                                                               |
