# Supplementary material for: A descriptive study of ten-year longitudinal changes in weight and waist circumference in the multi-ethnic rural Northern Norway. The SAMINOR Study, 2003-2014
Source: PubMed Central journal article supplement (PMC7029861; doi:10.1371/journal.pone.0229234), 2020-02-19
Supplement: pone.0229234.s005.pdf [file pone.0229234.s005.pdf]

S5 Table. Mean (standard deviation, SD) waist circumference (cm) in SAMINOR 1 (2003-2004) and longitudinal changes in waist circumference (cm) (95 % confidence interval) from SAMINOR 1 to SAMINOR 2 (2012-2014) according to ethnic group in women<sup>a</sup> born between 1934 and 1967 (aged 36 – 69 in SAMINOR 1) who attended both surveys. The SAMINOR Study (n=1955)

|                 | Birth year               | Age in 2003 (years) | Number of participants | Mean waist circumference, cm (SD) in SAMINOR 1 | Change in waist circumference, cm (95 % CI), SAMINOR 1 to SAMINOR 2 |
|-----------------|--------------------------|---------------------|------------------------|------------------------------------------------|---------------------------------------------------------------------|
| <b>Sami</b>     |                          |                     |                        |                                                |                                                                     |
|                 | 1964-1967                | 36-39               | 67                     | 81.5 (11.6)                                    | 10.4 (8.8,12.1)                                                     |
|                 | 1959-1963                | 40-44               | 116                    | 82.0 (10.1)                                    | 10.5 (9.2,11.7)                                                     |
|                 | 1954-1958                | 45-49               | 159                    | 83.9 (11.9)                                    | 10.0 (8.9,11.2)                                                     |
|                 | 1949-1953                | 50-54               | 165                    | 85.1 (11.2)                                    | 7.8 (6.8, 8.8)                                                      |
|                 | 1944-1948                | 55-59               | 135                    | 87.5 (11.0)                                    | 7.0 (5.6, 8.4)                                                      |
|                 | 1939-1943                | 60-64               | 78                     | 89.1 (11.5)                                    | 6.5 (4.8, 8.3)                                                      |
|                 | 1934-1938                | 65-69               | 69                     | 90.0 (10.7)                                    | 4.6 (3.1, 6.1)                                                      |
|                 |                          |                     |                        |                                                |                                                                     |
|                 | All Sami                 | 36-69               | 789                    | 85.3 (11.5)                                    | 8.3 (7.8, 8.8)                                                      |
|                 | p-value for linear trend |                     |                        | < 0.001                                        | < 0.001                                                             |
| <b>Non-Sami</b> |                          |                     |                        |                                                |                                                                     |
|                 | 1964-1967                | 36-39               | 95                     | 81.0 (10.7)                                    | 9.7 (8.2, 11.2)                                                     |
|                 | 1959-1963                | 40-44               | 154                    | 80.8 (10.3)                                    | 9.7 (8.5, 11.0)                                                     |
|                 | 1954-1958                | 45-49               | 182                    | 83.1 (10.7)                                    | 9.4 (8.2, 10.5)                                                     |
|                 | 1949-1953                | 50-54               | 234                    | 83.8 (10.5)                                    | 8.6 (7.7, 9.5)                                                      |
|                 | 1944-1948                | 55-59               | 228                    | 86.1 (13.0)                                    | 7.9 (6.8, 9.0)                                                      |
|                 | 1939-1943                | 60-64               | 163                    | 86.5 (11.5)                                    | 8.4 (7.1, 9.6)                                                      |
|                 | 1934-1938                | 65-69               | 110                    | 87.3 (10.9)                                    | 5.8 (4.3, 7.2)                                                      |
|                 |                          |                     |                        |                                                |                                                                     |
|                 | All non-Sami             | 36-69               | 1166                   | 84.2 (11.4)                                    | 8.5 (8.1, 9.0)                                                      |
|                 | p-value for linear trend |                     |                        | < 0.001                                        | < 0.001                                                             |

<sup>a</sup> Information about ethnic group was missing for 3 women.
